# Supplementary material for: TAK1 kinase switches cell fate from apoptosis to necrosis following TNF stimulation
Source: PubMed Central journal article supplement — J Cell Biol. 2014 Feb 17;204(4):607–23. doi: 10.1083/jcb.201305070 (PMC3926964; doi:10.1083/jcb.201305070), 2014-02-17
Supplement: supp_jcb.201305070_JCB_201305070_sm.pdf [file supp_jcb.201305070_JCB_201305070_sm.pdf]

Morioka et al., <http://www.jcb.org/cgi/content/full/jcb.201305070/DC1>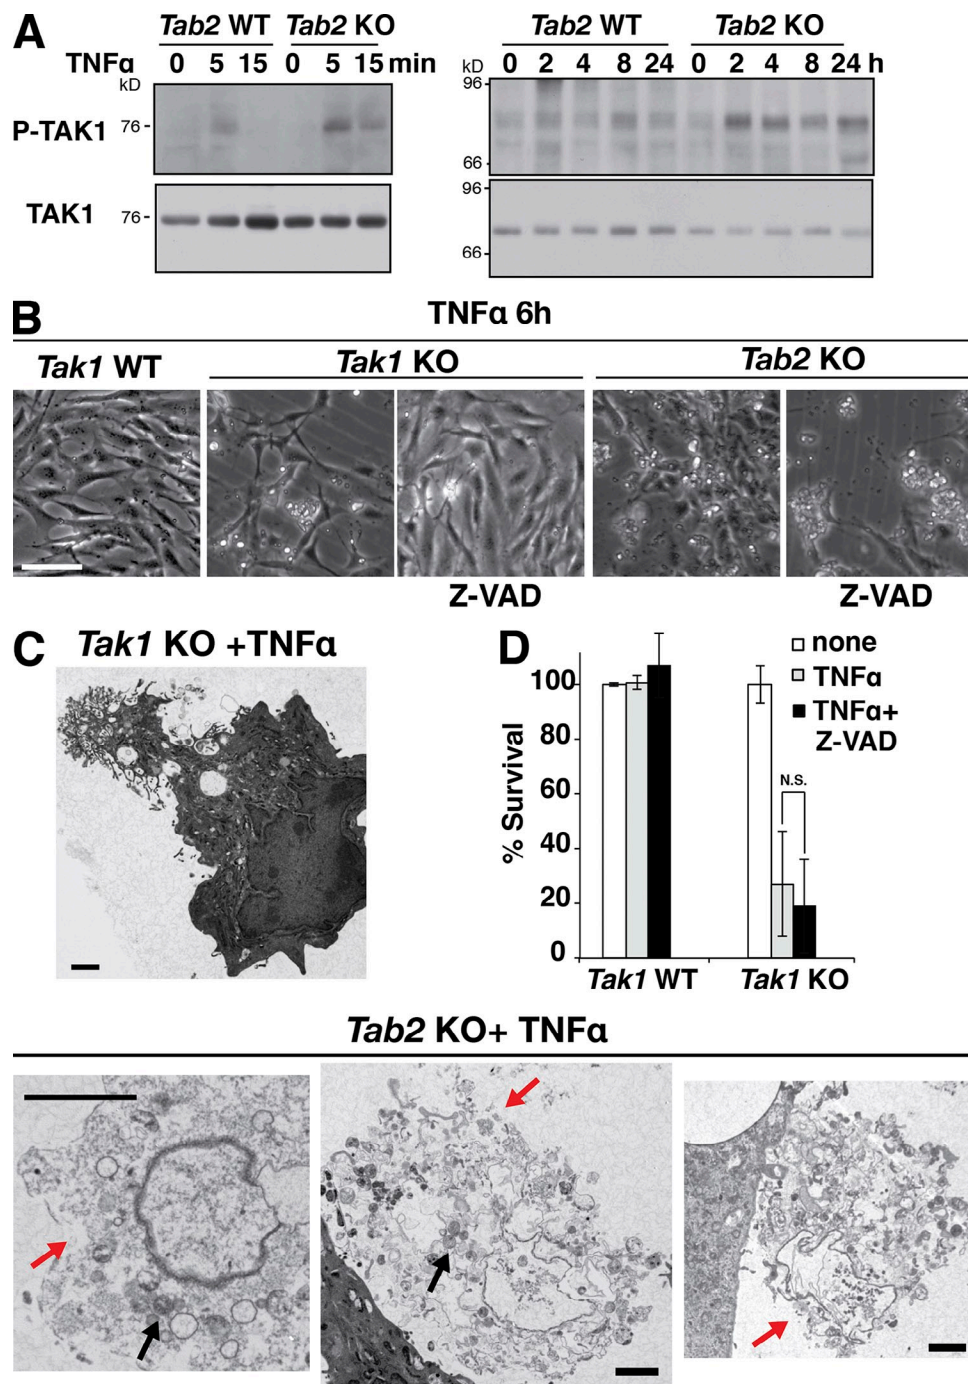

Figure S1. TNF induces hyperactivation of TAK1 and necrotic cell death in *Tab2*-deficient fibroblasts, while apoptosis is induced in *Tak1*-deficient fibroblasts. (A) *Tab2* WT and *Tab2* KO fibroblasts were stimulated with 20 ng/ml TNF, and cell lysates were analyzed by immunoblotting. Related to Fig. 1. (B) *Tak1*- and *Tab2*-deficient fibroblasts die within 6 h after TNF stimulation. *Tak1* WT, *Tak1* KO, or *Tab2* KO fibroblasts were stimulated with 20 ng/ml TNF, and bright-field photographs were taken at 6 h after TNF stimulation. Some cells were pre-incubated with 20  $\mu$ M Z-VAD for 1 h before TNF stimulation. Bar, 100  $\mu$ m. Related to Fig. 1 B. (C) Electron microscopic images. *Tak1* KO and *Tab2* KO fibroblasts were exposed to TNF (20 ng/ml for *Tak1* KO and 200 ng/ml for *Tab2* KO) for 6 h and samples were analysed using a transmission electron microscope. Black arrows, swollen mitochondria; red arrows, plasma membrane rupture. Bars, 2  $\mu$ m. Related to Fig. 1 C. (D) Inhibition of caspases does not block cell death in *Tak1*-deficient dermal fibroblasts at 24 h after TNF stimulation. *Tak1* WT and *Tak1* KO were pre-treated with 20  $\mu$ M vehicle (DMSO) or 20  $\mu$ M Z-VAD for 1 h and stimulated with 20 ng/ml TNF. Cell viability was determined at 24 h after TNF- $\alpha$  stimulation by the crystal violet assay (three independent experiments, mean  $\pm$  SD; N.S., not significant; P = 0.61). Related to Fig. 1B.

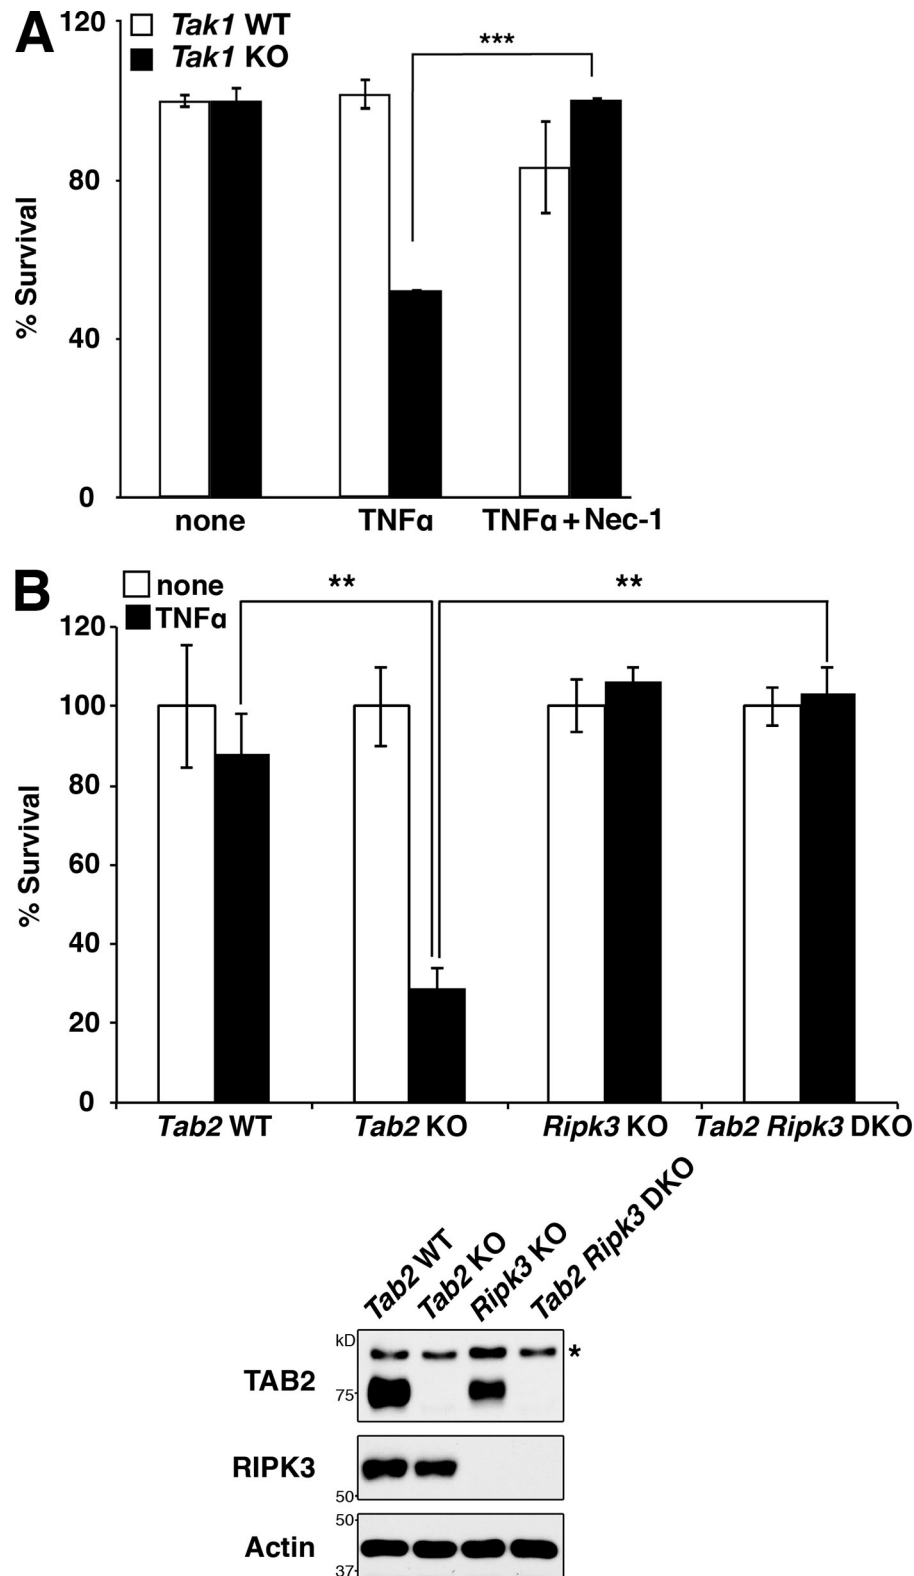

Figure S2. **Nec-1 blocks TNF-induced cell death in *Tak1*-deficient fibroblasts, and *Ripk3* deletion rescues TNF-induced cell death in *Tab2*-deficient fibroblasts.** (A) *Tak1* WT and *Tab1* KO fibroblasts were pre-treated with 30  $\mu$ M vehicle (DMSO) or 30  $\mu$ M Nec-1 for 1 h, and then stimulated with 20 ng/ml TNF- $\alpha$  for 24 h. Cell survival was determined by the crystal violet assay (three independent experiments, mean  $\pm$  SD; \*\*\*,  $P = 0.00023$ ). Related to Fig. 2. (B) *Ripk3* deficiency completely rescued TNF-induced cell death in *Tab2*-deficient fibroblasts. *Tab2* WT, *Ripk3* KO, *Tab2* KO, and *Tab2 Ripk3* DKO fibroblasts were treated with 200 ng/ml TNF for 24 h. Cell survival was determined by the crystal violet assay (three independent experiments, mean  $\pm$  SD; \*\*,  $P < 0.001$ ,  $P = 0.0093$ , and  $P = 0.0082$  from the left). Proteins of TAB2, RIPK3, and actin were analyzed by immunoblotting. Asterisk indicates a non-specific band. Related to Fig. 3.

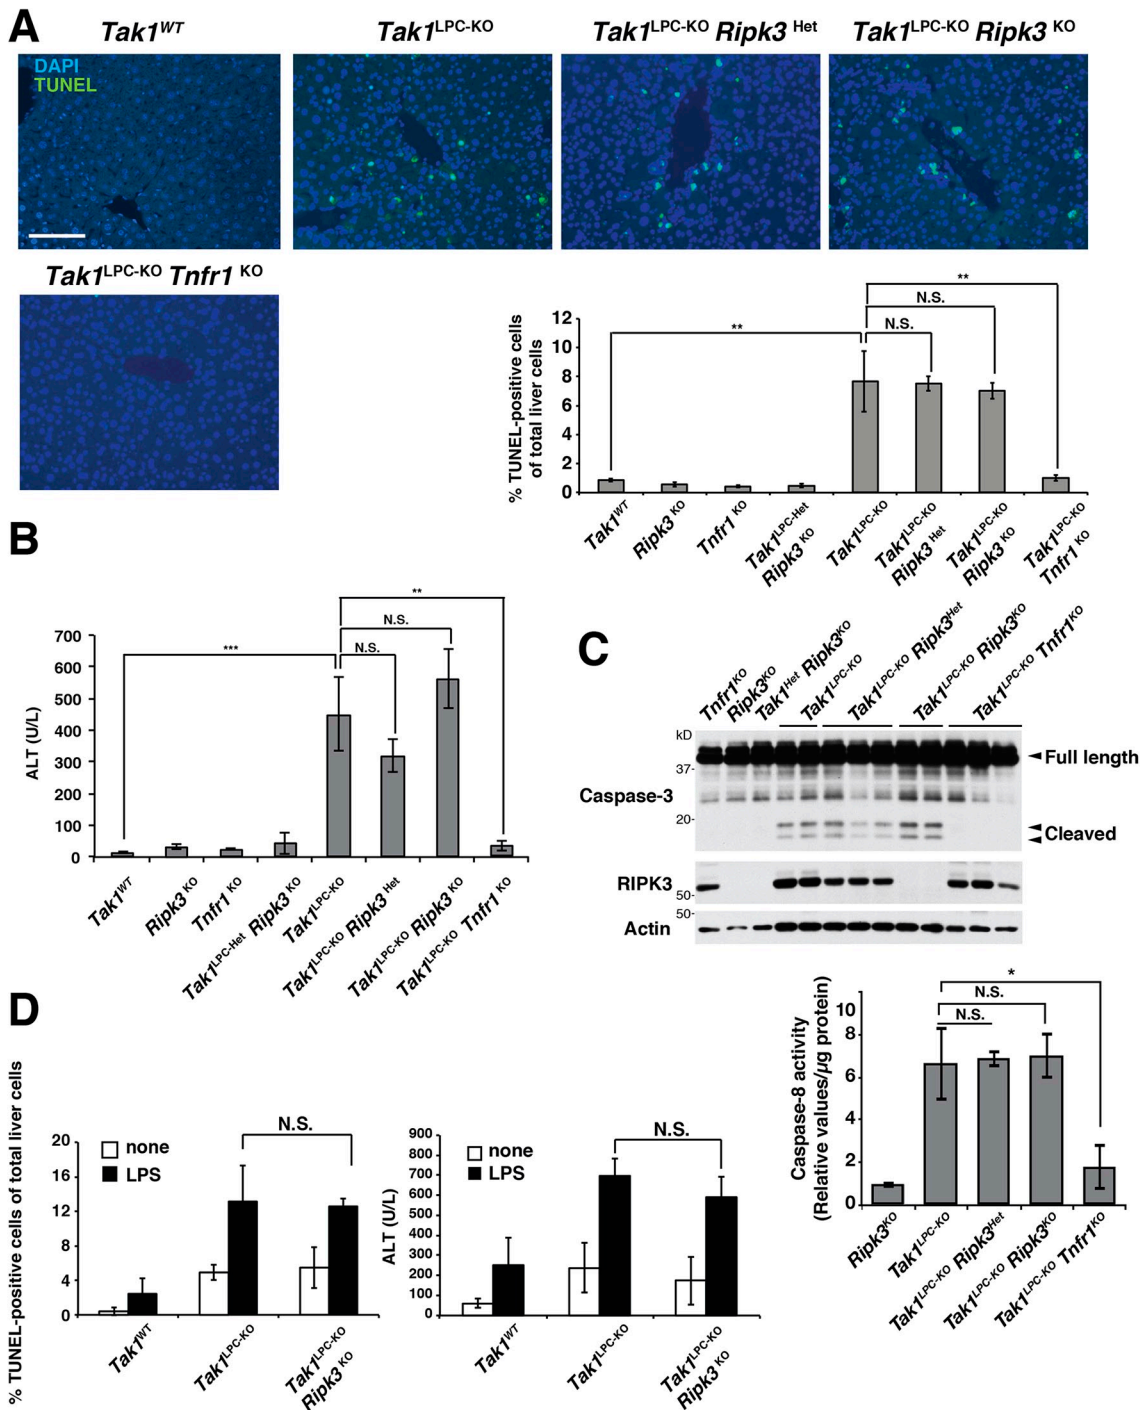

Figure S3. *Ripk3* deletion does not rescue liver injury in *Tak1*-deficient liver. (A) Livers from *Tak1*<sup>flox/flox</sup> (*Tak1* WT), *Ripk3*<sup>-/-</sup> (*Ripk3*<sup>KO</sup>), *Tnfr1*<sup>-/-</sup> (*Tnfr1*<sup>KO</sup>), *Tak1*<sup>flox/+</sup> Alb.Cre *Ripk3*<sup>-/-</sup> (*Tak1*<sup>LPC-Het</sup> *Ripk3*<sup>KO</sup>), Alb.Cre *Tak1*<sup>flox/flox</sup> (*Tak1*<sup>LPC-KO</sup>), Alb.Cre *Tak1*<sup>flox/flox</sup> *Ripk3*<sup>-/-</sup> (*Tak1*<sup>LPC-KO</sup> *Ripk3*<sup>KO</sup>), Alb.Cre *Tak1*<sup>flox/+</sup> *Ripk3*<sup>-/-</sup> (*Tak1*<sup>LPC-KO</sup> *Ripk3*<sup>Het</sup>), and Alb.Cre *Tak1*<sup>flox/flox</sup> *Tnfr1*<sup>-/-</sup> (*Tak1*<sup>LPC-KO</sup> *Tnfr1*<sup>KO</sup>); all *n* = 4) mice at 1–2 months of age were analyzed by TUNEL staining. Percentages of TUNEL-positive cells in total liver cells (DAPI-stained cells) are shown (mean  $\pm$  SD; \*\*, *P* < 0.01; N.S., not significant; *P* = 0.0048, *P* = 0.95, *P* = 0.64, and *P* = 0.0054 from the left). (B) Sera from the mice described in A were analyzed by an ALT assay kit (*n* = 4 per genotype; \*\*\*, *P* < 0.001; \*\*, *P* < 0.01; N.S., not significant; *P* = 0.0006, *P* = 0.15, *P* = 0.18, and *P* = 0.0036 from the left). (C) Caspase-3 activity was determined by immunoblotting using protein extracts from the mice described in A. Caspase-8 activity was also determined (bottom graph; *n* = 4 per genotype; \*, *P* < 0.05; N.S., not significant; *P* = 0.83, *P* = 0.77, and *P* = 0.015 from the left). (D and E) *Tak1*<sup>WT</sup>, *Tak1*<sup>LPC-KO</sup>, and *Tak1*<sup>LPC-KO</sup> *Ripk3*<sup>KO</sup> mice at 4–7 months old were intraperitoneally injected with LPS at 10 mg/kg for 24 h. Sera from the mice were analyzed by an ALT assay kit (D; *n* = 3 per genotype; N.S., not significant; *P* = 0.073). Percentages of TUNEL-positive cells in total liver cells (DAPI-stained cells) are shown (E; *n* = 3 per genotype; N.S., not significant; *P* = 0.83). Related to Fig. 4.

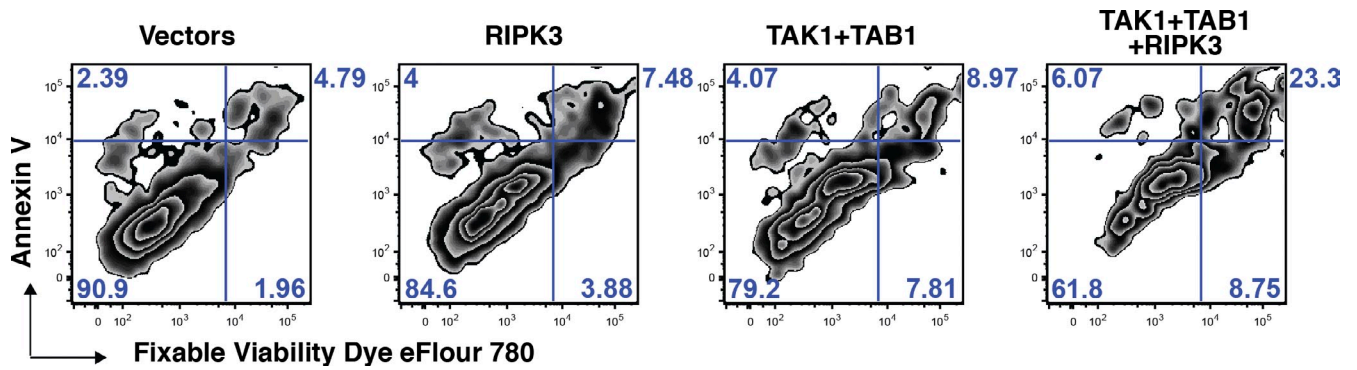

Figure S4. **Hyperactivation of TAK1 promotes RIPK3-dependent cell death in fibroblasts.** Dermal fibroblasts were transfected with 1  $\mu$ g of Flag-TAB1 (TAB1), DsRedMT7-TAK1 (TAK1), HA-RIPK3 (RIPK3), or their control vectors for the total amount of 3  $\mu$ g at 48 h after transfection. DsRed-positive transfected cells were gated, and cell death was analyzed by annexin V and fixable viability dye eFluor 780 staining. Related to Fig. 5.

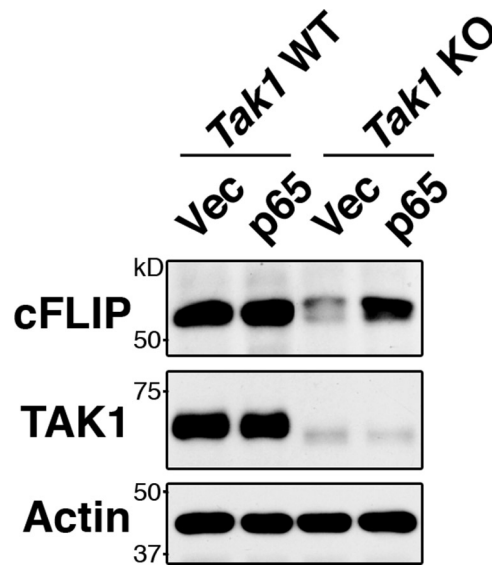

Figure S5. **Tak1 deficiency reduces the expression of cFLIP, which is rescued by p65 overexpression.** *Tak1* WT and *Tak1* KO fibroblasts were stably transfected with p65. Immunoblots of cFLIP, TAK1, and  $\beta$ -actin are shown. Related to Fig. 6 D.
